# Supplementary material for: Spatial differentiation and influencing factors of active layer thickness in the Da Hinggan Ling Prefecture
Source: Frontiers journal article supplement (doi:10.3389/feart.2022.1066662), 2023-01-20
Supplement: Table_1.docx [file Table_1.docx]

Supplementary File A:

| ID | Name | X | Y | ALT (cm) |
| --- | --- | --- | --- | --- |
| 1 | Happy Valley | -148.50 | 69.10 | 46.64 |
| 5 | Atqasuk | -157.40 | 70.45 | 52.33 |
| 6 | Betty Pingo | -148.87 | 70.28 | 53.46 |
| 7 | Kougarok | -164.63 | 65.46 | 70.14 |
| 9 | West Dock 1km | -148.56 | 70.37 | 57.59 |
| 14 | Deadhorse | -148.47 | 70.17 | 72.79 |
| 15 | Franklin Bluff | -148.72 | 69.68 | 70.27 |
| 16 | Happy Valley 1ha | -148.83 | 69.17 | 44.19 |
| 17 | Imnavait 1km | -149.50 | 68.50 | 57.64 |
| 18 | [Toolik 1km](http://www.gtnpdatabase.org/activelayers/view/18/) | -149.60 | 68.62 | 56.17 |
| 20 | Chandalar Shelf | -149.58 | 68.07 | 37.49 |
| 21 | Ivotuk | -155.74 | 68.48 | 54.92 |
| 22 | Council | -163.71 | 64.84 | 87.32 |
| 38 | Tolbachinsky Pass | 160.54 | 55.89 | 47.46 |
| 50 | Zackenberg ZEROCALM 1 | -20.50 | 74.47 | 85.63 |
| 51 | Zackenberg ZEROCALM 2 | -20.50 | 74.47 | 75.73 |
| 65 | Cape Rogozny | 176.97 | 64.78 | 59.88 |
| 68 | Lavrentiya | 171.05 | 65.60 | 60.26 |
| 69 | Lorino | -171.63 | 65.54 | 66.11 |
| 74 | [Mt. Rodinka Burn Site](http://www.gtnpdatabase.org/activelayers/view/74/) | 161.53 | 68.72 | 154.35 |
| 78 | [Andryushkino](http://www.gtnpdatabase.org/activelayers/view/78/) | 154.43 | 69.17 | 42.77 |
| 81 | [Yakutskoe Lake](http://www.gtnpdatabase.org/activelayers/view/81/) | 159.49 | 69.85 | 47.40 |
| 85 | [Lake Glukhoe](http://www.gtnpdatabase.org/activelayers/view/85/) | 160.96 | 68.80 | 97.73 |
| 86 | [Mt. Rodinka GRID](http://www.gtnpdatabase.org/activelayers/view/86/) | 161.50 | 68.74 | 89.67 |
| 100 | [Igarka](http://www.gtnpdatabase.org/activelayers/view/100/) | 86.44 | 67.48 | 94.14 |
| 111 | Vaskiny Dachi 1 | 68.89 | 70.28 | 71.98 |
| 112 | Vaskiny Dachi 2 | 68.88 | 70.30 | 72.94 |
| 116 | Marre Sale | 66.75 | 69.72 | 120.44 |
| 119 | Kashin Island | 53.85 | 68.23 | 82.79 |
| 120 | Bolvansky | 54.51 | 68.29 | 103.73 |
| 208 | Farmers Loop | -148.12 | 65.47 | 64.36 |
| 209 | Pearl Creek | -147.80 | 64.90 | 170.40 |
| 210 | Bonanza Creek | -148.00 | 64.75 | 232.88 |
| 230 | [Imnavait Creek MAT](http://www.gtnpdatabase.org/activelayers/view/230/) | -149.31 | 68.61 | 51.66 |
| 233 | [Betty Pingo WET](http://www.gtnpdatabase.org/activelayers/view/233/) | -148.92 | 70.28 | 50.04 |
| 250 | [Urengoy GAS FIELD GP5](http://www.gtnpdatabase.org/activelayers/view/250/) | 76.91 | 66.32 | 103.17 |
| 252 | Kruglaya | 176.97 | 64.63 | 49.75 |
| 253 | [Omolon](http://www.gtnpdatabase.org/activelayers/view/253/) | 158.90 | 68.72 | 38.36 |
| 260 | Harp | 66.08 | 66.72 | 111.34 |
| 261 | [Seida](http://www.gtnpdatabase.org/activelayers/view/261/) | 62.93 | 67.07 | 57.78 |

Table 1 Circum-Arctic region GTN-P monitoring stations
